as this group appears to be similar to women without diabetes with respect to infant feeding decisions.

MARGRETE JOHNSTON, MD, MPH<sup>1</sup>  
 CORNELIA GRAVES, MD<sup>2</sup>  
 PATRICK G. ARBOGAST, PHD<sup>3</sup>  
 WILLIAM O. COOPER, MD, MPH<sup>1</sup>

From the <sup>1</sup>Department of Pediatrics, Vanderbilt University School of Medicine, Nashville, Tennessee; the <sup>2</sup>Department of Obstetrics and Gynecology, Vanderbilt University School of Medicine, Nashville, Tennessee; and the <sup>3</sup>Department of Biostatistics, Vanderbilt University School of Medicine, Nashville, Tennessee.

Address correspondence to Margrete Johnston, MD, MPH, 56 Old Club Ct., Nashville, TN 37215-1100. E-mail: margrete\_johnston@hotmail.com.  
 DOI: 10.2337/dc06-0174

© 2006 by the American Diabetes Association.

## References

1. American Academy of Pediatrics: Breast-feeding and the use of human milk. *Pediatrics* 115:496–506, 2005
2. Arora S, McJunkin C, Weher J, Kuhn P: Major factors influencing breastfeeding rates: mother's perception of father's attitude on milk supply. *Pediatrics* 106:e67, 2000
3. Freed GL, Towes TM, Schendler RJ: Prenatal determination of demographic and attitudinal factors regarding feeding practice in an indigent population. *Am J Perinatol* 5:420–424, 1992
4. Scott J, Shaker I: Parental attitudes toward breastfeeding: their association with feeding outcome at hospital discharge. *Birth* 31:125–131, 2004

## Treatment of Hyperglycemia in a 7-Year-Old Child Diagnosed With Neonatal Diabetes

**P**ermanent neonatal diabetes is persistent, insulin-requiring hyperglycemia occurring before 1 month of life. Recent studies have identified activating mutations in *KCNJ11* encoding the Kir6.2 subunit of the ATP-sensitive  $K^+$  channel as a common cause of neonatal diabetes (1–5). These patients can be successfully managed with oral sulfonylureas rather than insulin (2,4,6,7). We describe our experience with a 7-year-old Mexican-American girl diagnosed with insulin-dependent diabetes at 2 weeks of age when she presented with a respiratory infection. Her blood glucose level was 442

mg/dl, C-peptide 0.33 ng/ml (ref. 0.8–4), insulin 3.1 uU/ml (ref. 0–22), and HbA<sub>1c</sub> (A1C) 7.7% (ref. <6.4), and she had negative diabetes autoantibodies. Her mother was diagnosed with insulin-dependent diabetes at 6 months of age. The prognosis was evaluated at the pediatric diabetes center at Loma Linda University at the age of 6 years, and DNA testing revealed the presence of the permanent neonatal diabetes-associated mutation Arg201His in *KCNJ11* in both her and her mother (2). Glucagon and mixed-meal glucose tolerance testing did not show an increment in C-peptide from the baseline value. Insulin was weaned and discontinued over 2 weeks, with a starting glyburide dose of 1.25 mg b.i.d. ( $0.05 \text{ mg} \cdot \text{kg}^{-1} \cdot \text{day}^{-1}$ ) and incremental increase to the current dose of 3.5 mg glyburide b.i.d. Previously, the patient's A1C on insulin ranged from 7.1 to 11.5%. Off insulin, and over the past 24 months, her quarterly A1C range was 5.1–6.3%, with no record or symptoms suggestive of hypoglycemia. Our results were consistent with other reports in the literature (2,4,6,7). The patient and her family were overwhelmingly pleased with the discontinuation of insulin, which they referred to as “a miracle.”

EBA HATHOUT, MD<sup>1</sup>  
 JOHN MACE, MD<sup>1</sup>  
 GRAEME I. BELL, PHD<sup>2</sup>  
 PÅL R. NJØLSTAD, MD, PHD<sup>3,4</sup>

From the <sup>1</sup>Department of Pediatrics, Loma Linda University, Loma Linda, California; the <sup>2</sup>Department of Medicine and Human Genetics, University of Chicago, Chicago, Illinois; the <sup>3</sup>Department of Clinical Medicine, University of Bergen, Bergen, Norway; and the <sup>4</sup>Department of Pediatrics, Haukeland University Hospital, Bergen, Norway.

Address correspondence to Eba Hathout, MD, FAAP, Professor and Chief, Division of Pediatric Endocrinology and Diabetes, Department of Pediatrics, Loma Linda University, 11175 Campus St., Coleman Pavilion, Room A1120R, Loma Linda, CA 92354. E-mail: ehathout@ahs.llumc.edu.

DOI: 10.2337/dc06-0487

© 2006 by the American Diabetes Association.

## References

1. Gloyn AL, Pearson ER, Antcliff JF, Proks P, Bruining GJ, Slingerland AS, Howard N, Srinivasan S, Silva JM, Molnes J, Edghill EL, Frayling TM, Temple IK, Mackay D, Shield JP, Sumnik Z, van Rhijn A, Wales JK, Clark P, Gorman S, Aisenberg J, Ellard S, Njolstad PR, Ashcroft FM, Hattersley AT: Activating mutations in the gene encoding the ATP-sensitive potassium-channel subunit Kir6.2 and permanent neonatal diabetes. *N Engl J Med* 350:1838–1849, 2004

2. Sagen JV, Raeder H, Hathout E, Shehadeh N, Gudmundsson K, Baevre H, Abuelo D, Phornphutkul C, Molnes J, Bell GL, Gloyn AL, Hattersley AT, Molven A, Sovik O, Njolstad PR: Permanent neonatal diabetes due to mutations in *KCNJ11* encoding Kir6.2: patient characteristics and initial response to sulfonylurea therapy. *Diabetes* 53:2713–2718, 2004
3. Vaxillaire M, Populaire C, Busiah K, Cave H, Gloyn AL, Hattersley AT, Czernichow P, Froguel P, Polak M: Kir6.2 mutations are a common cause of permanent neonatal diabetes in a large cohort of French patients. *Diabetes* 53:2719–2722, 2004
4. Zung A, Glaser B, Nimri R, Zadik Z: Glibenclamide treatment in permanent neonatal diabetes mellitus due to an activating mutation in Kir6.2. *J Clin Endocrinol Metab* 89:5504–5507, 2004
5. Massa O, Iafusco D, D'Amato E, Gloyn AL, Hattersley AT, Pasquino B, Tonini G, Dammacco F, Zanette G, Meschi F, Porzio O, Bottazzo G, Crino A, Lorini R, Cerutti F, Vanelli M, Barbetti F, Early Onset Diabetes Study Group of the Italian Society of Pediatric Endocrinology and Diabetology: *KCNJ11* activating mutations in Italian patients with permanent neonatal diabetes. *Hum Mutat* 25:22–27, 2005
6. Codner E, Flanagan S, Ellard S, Garcia H, Hattersley AT: High-dose glibenclamide can replace insulin therapy despite transitory diarrhea in early-onset diabetes caused by a novel R201L Kir6.2 mutation (Letter). *Diabetes Care* 28:758–759, 2005
7. Klupa T, Edghill EL, Nazim J, Sieradzki J, Ellard S, Hattersley AT, Malecki MT: The identification of a R201H mutation in *KCNJ11*, which encodes Kir6.2, and successful transfer to sustained-release sulfonylurea therapy in a subject with neonatal diabetes: evidence for heterogeneity of beta cell function among carriers of the R201H mutation (Letter). *Diabetologia* 48:1029–1031, 2005

## Circulating Vitamin D Concentrations in Two Neighboring Populations With Markedly Different Incidence of Type 1 Diabetes

**R**ecent studies have suggested that vitamin D deficiency may increase the risk of type 1 diabetes (1). In Finland, the incidence of type 1 diabetes is the highest in the world, while in the neighboring Karelian Republic of Russia, the incidence is approximately one-sixth
